# Supplementary figures and images for: High-throughput clone library analysis of the mucosa-associated microbiota reveals dysbiosis and differences between inflamed and non-inflamed regions of the intestine in inflammatory bowel disease
Source: Springer Nature journal article supplement (doi:10.1186/1471-2180-11-7), 2011-01-01

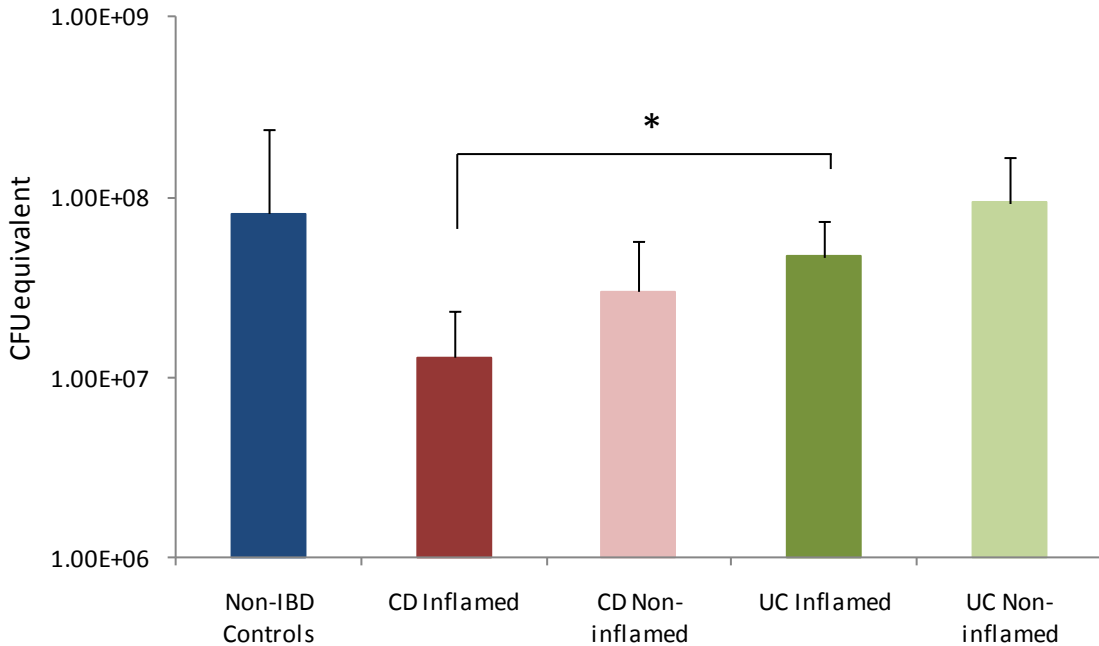

Supplement: 12866_2010_1294_MOESM2_ESM.pdf [file 12866_2010_1294_MOESM2_ESM.pdf]

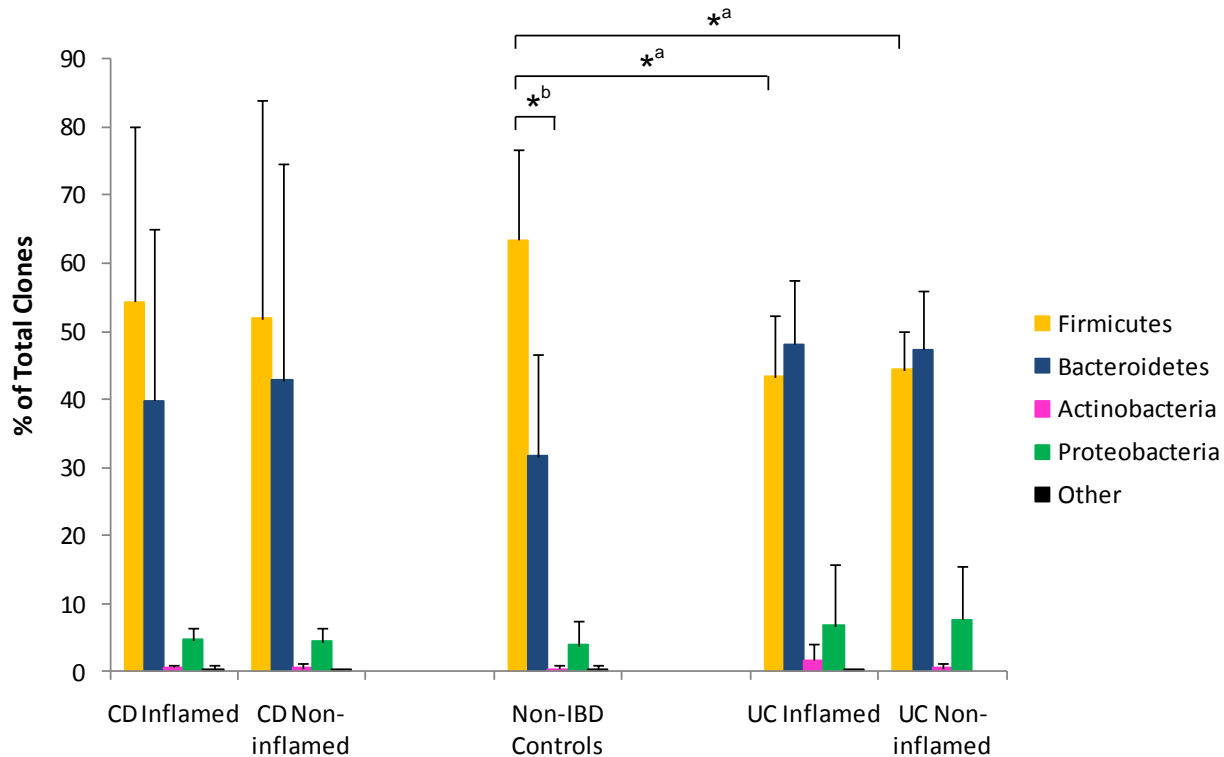

Supplement: 12866_2010_1294_MOESM3_ESM.pdf [file 12866_2010_1294_MOESM3_ESM.pdf]

**A**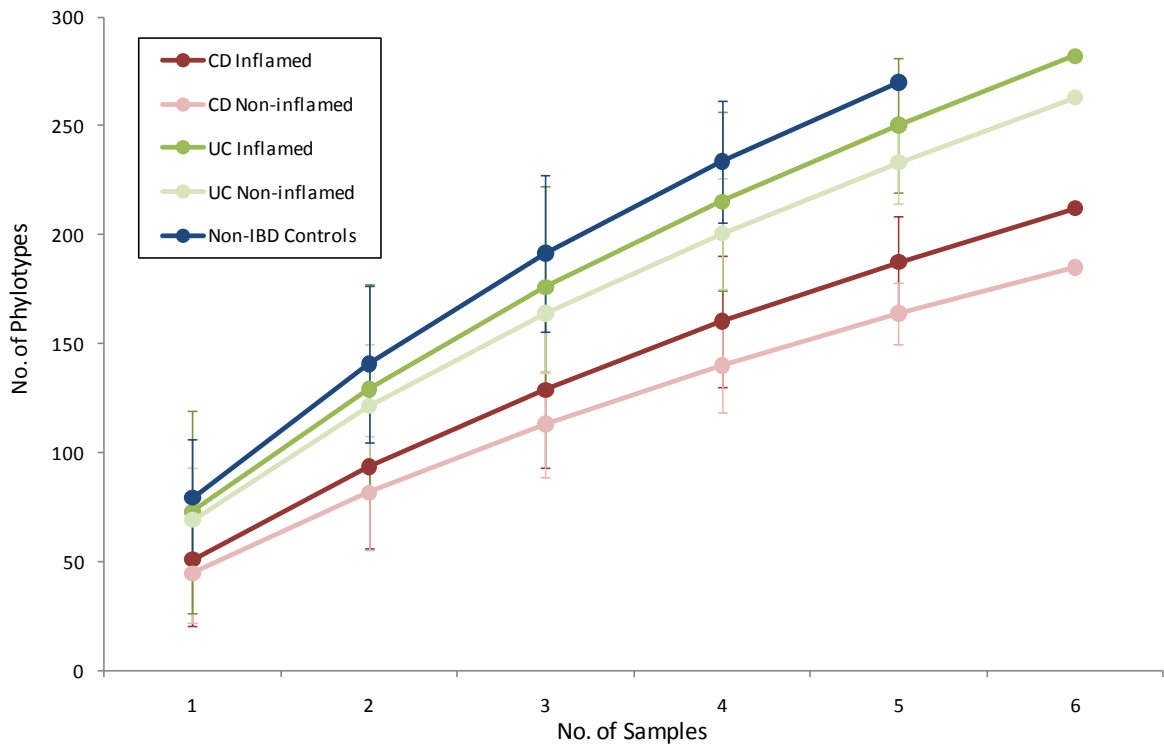**B**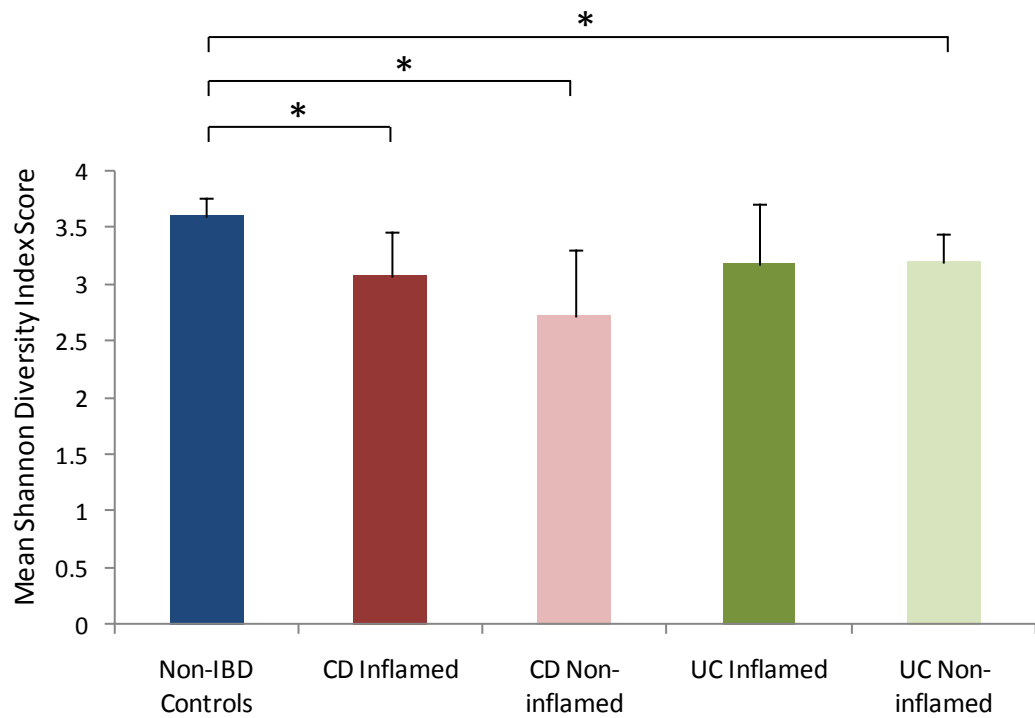

Supplement: 12866_2010_1294_MOESM4_ESM.pdf [file 12866_2010_1294_MOESM4_ESM.pdf]

0.1

Legend:

## Dataset Family Level Classification

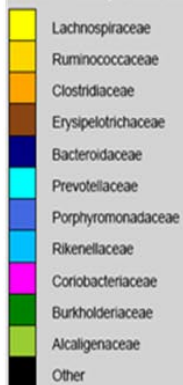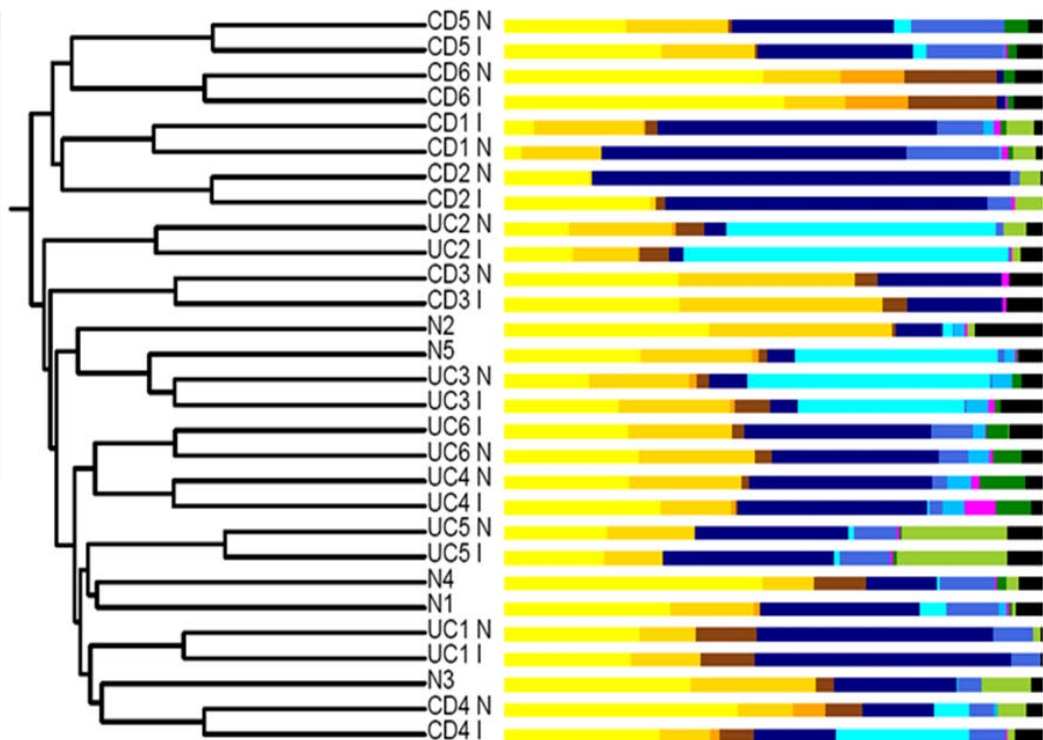

Supplement: 12866_2010_1294_MOESM5_ESM.pdf [file 12866_2010_1294_MOESM5_ESM.pdf]

# PCoA - P1 vs P2

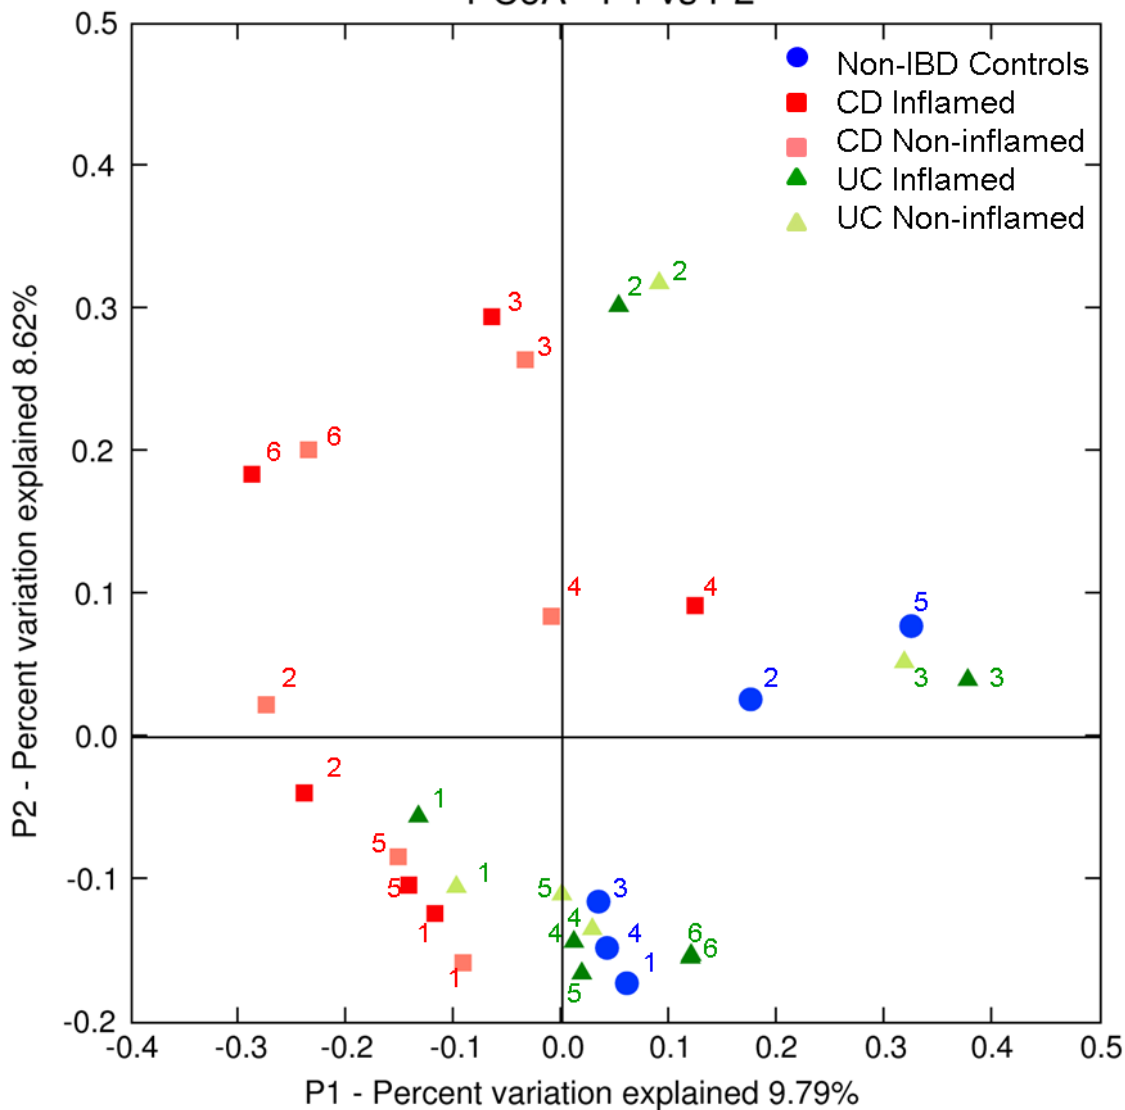

Supplement: 12866_2010_1294_MOESM6_ESM.pdf [file 12866_2010_1294_MOESM6_ESM.pdf]
